# Supplementary material for: In Vivo Genotoxicity and Toxicity Assessment of Sterigmatocystin Individually and in Mixture with Aflatoxin B1
Source: MDPI journal article supplement (doi:10.3390/toxins15080491), 2023-08-03
Supplement: s1 [file s1]

# Supplementary Materials: In Vivo Genotoxicity and Toxicity Assessment of Sterigmatocystin Individually and in Mixture with Aflatoxin B1

Maria Alonso-Jauregui, Adela López de Cerain, Amaya Azqueta, Adriana Rodriguez-Garraus, Ana Gloria Gil, Elena González-Peñas and Ariane Vettorazzi

**Table S1.** Erythrocyte MN test results in bone marrow samples after 24h of receiving AFB1 (0.25 mg/kg b.w.), STER (20 mg/kg b.w.) or AFB1+STER in a single oral dose. The table collects the group raw data and mean and SD for each parameter evaluated.

| Group ID  | PCE <sup>1</sup> | NCE         | PCE (%)   | PCE <sup>2</sup> | MN       | MN (%)   |
|-----------|------------------|-------------|-----------|------------------|----------|----------|
| NC        | 240              | 275         | 46.6      | 4003             | 10       | 0.2      |
|           | 220              | 291         | 43.1      | 4003             | 10       | 0.2      |
|           | 283              | 275         | 50.7      | 4008             | 13       | 0.3      |
|           | 223              | 299         | 42.7      | 4003             | 23       | 0.6      |
|           | 310              | 193         | 61.6      | 4000             | 14       | 0.4      |
|           | 255.2±39.6       | 266.6±42.4  | 49±7.8    | 4003.4±2.9       | 14±5.3   | 0.3±0.2  |
| AFB1      | 287              | 214         | 57.3      | 4007             | 12       | 0.3      |
|           | 209              | 320         | 39.5      | 4002             | 14       | 0.3      |
|           | 285              | 245         | 53.8      | 4001             | 17       | 0.4      |
|           | 86               | 436         | 16.5      | 4001             | 39       | 1.0      |
|           | 347              | 156         | 69        | 4001             | 18       | 0.4      |
|           | 242.8±100.4      | 274.2±108.1 | 47.2±20.1 | 4002.4±2.6       | 20±10.9  | 0.5±0.3  |
| STER      | 260              | 250         | 51.0      | 4006             | 10       | 0.2      |
|           | 212              | 319         | 39.9      | 4001             | 14       | 0.3      |
|           | 231              | 295         | 43.9      | 4004             | 11       | 0.3      |
|           | 233              | 295         | 44.1      | 4002             | 9        | 0.2      |
|           | 300              | 227         | 56.9      | 4002             | 6        | 0.1      |
|           | 247.2±34.1       | 277.2±37.5  | 47.2±6.7  | 4003±2           | 10±2.9   | 0.2±0.1  |
| AFB1+STER | 323              | 181         | 64.1      | 4003             | 11       | 0.3      |
|           | 160              | 343         | 31.8      | 4002             | 13       | 0.3      |
|           | 274              | 227         | 54.7      | 4001             | 7        | 0.2      |
|           | 114              | 403         | 22.1      | 4003             | 12       | 0.3      |
|           | 263              | 256         | 50.7      | 4000             | 12       | 0.3      |
|           | 221.4±83.7       | 282±89.8    | 44.7±17.2 | 4001.8±1.3       | 11±2.3   | 0.3±0.04 |
| PC        | 261              | 240         | 52.1      | 4005             | 11       | 0.3      |
|           | 291              | 218         | 57.2      | 4004             | 23       | 0.6      |
|           | 168              | 390         | 30.1      | 4003             | 43       | 1.1      |
|           | 179              | 357         | 33.4      | 4006             | 40       | 1.0      |
|           | 72               | 456         | 13.6      | 4006             | 64       | 1.6      |
|           | 194.2±86.1       | 332.2±101   | 37.3±17.6 | 4004.8±1.3       | 36±20.3* | 0.9±0.5* |

AFB1: aflatoxin B1. MN: micronuclei. NC: negative control. NCE: normochromic erythrocytes from a total of 500 erythrocytes approximately (PCE+NCE). PCE1: polychromatic erythrocytes from a total of 500 erythrocytes approximately (PCE+NCE). PCE2: total number of polychromatic erythrocytes analysed. PC: positive control. STER: sterigmatocystin. The statistical study was performed for each parameter through Kruskal-Wallis test. If the result was significant, Mann-Whitney U test was performed comparing each group of treatment with the negative control: (\*) significant ( $p < 0.05$ ).

**Table S2.** Results of the mycotoxin determination in plasma, liver, and kidney of the single dose oral genotoxicity study. The table collects the group mean and SD.

| Mycotoxin quantified | Group | Plasma (ng/mL) |           | Liver (ng/g)   |             | Kidney (ng/g) |               |
|----------------------|-------|----------------|-----------|----------------|-------------|---------------|---------------|
|                      |       | 3h             | 24h       | 3h             | 24h         | 3h            | 24h           |
| AFB1                 | NC    | <LOQ           | <LOQ      | <LOQ           | <LOQ        | <LOQ          | <LOQ          |
|                      | AFB1  | 0.48±0.34      | 0.16±0.22 | 5.79±3.53##    | 1.37±0.93   | 0.78±0.80     | <LOQ          |
|                      | STER  | <LOQ           | <LOQ      | <LOQ           | <LOQ        | <LOQ          | <LOQ          |
|                      | A+S   | 1.34±0.78#     | 0.43±0.27 | 16.59±13.61    | 2.35±2.09   | 2.62±2.33     | <LOQ          |
| STER                 | NC    | <LOQ           | <LOQ      | <LOQ           | <LOQ        | <LOQ          | <LOQ          |
|                      | AFB1  | <LOQ           | <LOQ      | <LOQ           | <LOQ        | <LOQ          | 4.04±2.5#\$\$ |
|                      | STER  | 52.54±20.07##  | 9.13±3.04 | 431.14±185.3## | 61.51±33.1  | 60.79±6.36##  | 14.70±7.80    |
|                      | A+S   | 57.09±51.43##  | 7.73±2.25 | 1359.7±1515.3# | 158.4±185.2 | 103.7±36.4##  | 14.58±6.40    |

AFB1: aflatoxin B1. A+S: AFB1+STER. NC: negative control. STER: sterigmatocystin. The inferential study was performed for each parameter through Kruskal-Wallis test. If the result was significant, Mann-Whitney U test was performed comparing the groups among 3h and 24h in each group of treatment: (#) significant (p<0.05) and (##) very significant (p<0.01). Also, the groups of AFB1 or STER alone were compared to the mixture (3h and 24h separately): (\$) significant (p<0.05) and (\$\$) very significant (p<0.01).

**Table S3.** Mean values for retention times ( $t_R$ ) and transitions ratios (q/Q) of the calibrators and the samples for AFB1 in plasma, liver and kidney, along with their respective relative error (RE) (%) values.

| $t_R$ plasma |         | RE (%) | $t_R$ liver |         | RE (%) | $t_R$ kidney |         | RE (%) |
|--------------|---------|--------|-------------|---------|--------|--------------|---------|--------|
| calibrators  | samples |        | calibrators | samples |        | calibrators  | samples |        |
| 4.97         | 4.97    | 0      | 5.47        | 5.45    | 0.4    | 5.34         | 5.30    | 0.7    |
| q/Q plasma   |         | RE (%) | q/Q liver   |         | RE (%) | q/Q kidney   |         | RE (%) |
| calibrators  | samples |        | calibrators | samples |        | calibrators  | samples |        |
| 58.7         | 49.8    | 15.2   | 65.89       | 63.96   | 2.9    | 68.82        | 64.26   | 6.6    |

**Table S4.** Mean values for retention times ( $t_R$ ) and transitions ratios (q/Q) of the calibrators and the samples for STER in plasma, liver and kidney, along with their respective relative error (RE) (%) values.

| $t_R$ plasma |         | RE (%) | $t_R$ liver |         | RE (%) | $t_R$ kidney |         | RE (%) |
|--------------|---------|--------|-------------|---------|--------|--------------|---------|--------|
| calibrators  | samples |        | calibrators | samples |        | calibrators  | samples |        |
| 16.38        | 16.4    | 0.1    | 17.08       | 17.03   | 0.3    | 16.91        | 16.85   | 0.4    |
| q/Q plasma   |         | RE (%) | q/Q liver   |         | RE (%) | q/Q kidney   |         | RE (%) |
| calibrators  | samples |        | calibrators | samples |        | calibrators  | samples |        |
| 94.03        | 94.47   | 0.5    | 99.66       | 97.66   | 2.0    | 104.89       | 97.8    | 6.8    |

**Table S5.** Calibration curve equations and descriptors for AFB1 and STER in plasma, liver and kidney.

| Equation |        |                   | N° calibrators<br>(RE% <15) | Range<br>(ng/mL) |
|----------|--------|-------------------|-----------------------------|------------------|
| AFB1     | Plasma | y=479.94x+23.28   | 8                           | 0.09-1.8         |
|          | Liver  | y=191.78x-9.10    | 6                           | 0.18-5.5         |
|          | Kidney | y=424.92x-12.32   | 10                          | 0.18-5.5         |
| STER     | Plasma | y=637.84x-1425.92 | 6                           | 2.7-27.52        |
|          | Liver  | y=52.47x+55.94    | 6                           | 0.92-27.52       |
|          | Kidney | y=205.79x-36.03   | 7                           | 0.92-27.52       |

**Table S6.** AFB1 individual levels in plasma samples (ng/mL) 3h and 24h after administration.

|            | M1   | M2   | M3   | M4   | M5   | Average |
|------------|------|------|------|------|------|---------|
| <b>3h</b>  |      |      |      |      |      |         |
| NC         | <LOQ | 0.18 | <LOQ | <LOQ | <LOQ | <LOQ    |
| AFB1       | 0.59 | 0.15 | 0.19 | 1.00 | 0.47 | 0.48    |
| STER       | <LOQ | 0.14 | <LOQ | <LOQ | <LOQ | <LOQ    |
| A+S        | 1.12 | 2.13 | 0.87 | 0.41 | 2.17 | 1.34    |
| <b>24h</b> |      |      |      |      |      |         |
| NC         | <LOQ | <LOQ | <LOQ | <LOQ | <LOQ | <LOQ    |
| AFB1       | <LOQ | 0.33 | <LOQ | <LOQ | 0.46 | 0.16    |
| STER       | <LOQ | <LOQ | <LOQ | 0.27 | <LOQ | <LOQ    |
| A+S        | 0.79 | 0.24 | 0.28 | 0.19 | 0.63 | 0.43    |

AFB1: aflatoxin B1. A+S: AFB1+STER. M1-5: male rats from 1 to 5. NC: negative control. LOQ: limit of quantification (0.09 ng/mL).  
STER: sterigmatocystin.

**Table S7.** STER individual levels in plasma samples (ng/mL) 3h and 24h after administration.

|            | M1     | M2    | M3    | M4    | M5     | Average |
|------------|--------|-------|-------|-------|--------|---------|
| <b>3h</b>  |        |       |       |       |        |         |
| NC         | <LOQ   | <LOQ  | <LOQ  | <LOQ  | <LOQ   | <LOQ    |
| AFB1       | <LOQ   | <LOQ  | <LOQ  | <LOQ  | <LOQ   | <LOQ    |
| STER       | 63.62  | 50.28 | 57.39 | 19.56 | 71.85  | 52.54   |
| A+S        | 121.54 | 25.88 | 20.03 | 13.88 | 104.10 | 57.09   |
| <b>24h</b> |        |       |       |       |        |         |
| NC         | <LOQ   | <LOQ  | <LOQ  | <LOQ  | <LOQ   | <LOQ    |
| AFB1       | <LOQ   | 2.71  | <LOQ  | <LOQ  | <LOQ   | <LOQ    |
| STER       | 8.96   | 8.47  | 8.22  | 14.13 | 5.85   | 9.12    |
| A+S        | 7.28   | 6.06  | 8.87  | 11.00 | 5.43   | 7.73    |

AFB1: aflatoxin B1. A+S: AFB1+STER. M1-5: male rats from 1 to 5. NC: negative control. LOQ: limit of quantification (2.7 ng/mL).  
STER: sterigmatocystin.

**Table S8.** AFB1 individual levels in liver samples (ng/g) 3h and 24h after administration.

|            | M1    | M2    | M3   | M4    | M5    | Average |
|------------|-------|-------|------|-------|-------|---------|
| <b>3h</b>  |       |       |      |       |       |         |
| NC         | <LOQ  | <LOQ  | <LOQ | <LOQ  | <LOQ  | <LOQ    |
| AFB1       | 5.87  | 2.60  | 6.42 | 11.28 | 2.76  | 5.79    |
| STER       | <LOQ  | <LOQ  | 2.81 | <LOQ  | <LOQ  | <LOQ    |
| A+S        | 19.19 | 24.00 | <LOQ | 6.05  | 33.72 | 16.59   |
| <b>24h</b> |       |       |      |       |       |         |
| NC         | <LOQ  | <LOQ  | <LOQ | <LOQ  | <LOQ  | <LOQ    |
| AFB1       | 0.80  | 2.05  | <LOQ | 1.79  | 2.19  | 1.44    |
| STER       | <LOQ  | <LOQ  | <LOQ | <LOQ  | <LOQ  | <LOQ    |
| A+S        | 5.57  | 1.19  | <LOQ | 2.20  | 2.80  | 2.35    |

AFB1: aflatoxin B1. A+S: AFB1+STER. M1-5: male rats from 1 to 5. NC: negative control. LOQ: limit of quantification (0.72 ng/g).  
STER: sterigmatocystin.

**Table S9.** STER individual levels in liver samples (ng/g) 3h and 24h after administration.

|            | M1     | M2     | M3      | M4     | M5     | Average |
|------------|--------|--------|---------|--------|--------|---------|
| <b>3h</b>  |        |        |         |        |        |         |
| NC         | <LOQ   | <LOQ   | 5.26    | <LOQ   | <LOQ   | <LOQ    |
| AFB1       | 3.70   | <LOQ   | <LOQ    | <LOQ   | <LOQ   | <LOQ    |
| STER       | 642.91 | 413.09 | 165.23  | 369.96 | 564.53 | 431.14  |
| A+S        | 985.28 | 478.49 | 4022.36 | 349.21 | 963.38 | 1359.74 |
| <b>24h</b> |        |        |         |        |        |         |
| NC         | <LOQ   | <LOQ   | 6.78    | 10.86  | <LOQ   | <LOQ    |
| AFB1       | <LOQ   | <LOQ   | 8.83    | 9.31   | <LOQ   | <LOQ    |
| STER       | 63.85  | 112.99 | 43.19   | 24.21  | 63.33  | 61.51   |
| A+S        | 45.40  | 63.33  | 112.30  | 486.76 | 84.36  | 158.43  |

AFB1: aflatoxin B1. A+S: AFB1+STER. M1-5: male rats from 1 to 5. NC: negative control. LOQ: limit of quantification (3.68 ng/g). STER: sterigmatocystin.

**Table S10.** AFB1 individual levels in kidney samples (ng/g) 3h and 24h after administration.

|            | M1   | M2   | M3   | M4   | M5   | Average |
|------------|------|------|------|------|------|---------|
| <b>3h</b>  |      |      |      |      |      |         |
| NC         | <LOQ | <LOQ | <LOQ | <LOQ | <LOQ | <LOQ    |
| AFB1       | <LOQ | <LOQ | 1.10 | 1.90 | 0.89 | 0.8     |
| STER       | <LOQ | <LOQ | 1.70 | <LOQ | <LOQ | <LOQ    |
| A+S        | 1.68 | 5.71 | <LOQ | 1.40 | 4.32 | 2.6     |
| <b>24h</b> |      |      |      |      |      |         |
| NC         | <LOQ | <LOQ | <LOQ | <LOQ | <LOQ | <LOQ    |
| AFB1       | <LOQ | <LOQ | <LOQ | <LOQ | <LOQ | <LOQ    |
| STER       | <LOQ | <LOQ | <LOQ | <LOQ | <LOQ | <LOQ    |
| A+S        | 1.74 | <LOQ | <LOQ | <LOQ | <LOQ | <LOQ    |

AFB1: aflatoxin B1. A+S: AFB1+STER. M1-5: male rats from 1 to 5. NC: negative control. LOQ: limit of quantification (0.72 ng/g). STER: sterigmatocystin.

**Table S11.** STER individual levels in kidney samples (ng/g) from animals administered for 3h and 24h.

|            | M1     | M2    | M3     | M4    | M5     | Average |
|------------|--------|-------|--------|-------|--------|---------|
| <b>3h</b>  |        |       |        |       |        |         |
| NC         | <LOQ   | <LOQ  | 4.67   | <LOQ  | 4.02   | <LOQ    |
| AFB1       | <LOQ   | <LOQ  | <LOQ   | <LOQ  | 4.13   | <LOQ    |
| STER       | 68.00  | 65.70 | 60.41  | 52.02 | 57.81  | 60.79   |
| A+S        | 106.14 | 85.84 | 101.21 | 61.74 | 160.40 | 103.7   |
| <b>24h</b> |        |       |        |       |        |         |
| NC         | <LOQ   | 4.10  | 3.85   | 5.01  | <LOQ   | <LOQ    |
| AFB1       | <LOQ   | 4.52  | 6.78   | 4.42  | 4.47   | 4.04    |
| STER       | 14.87  | 27.58 | 10.54  | 7.02  | 13.50  | 14.70   |
| A+S        | 9.72   | 10.88 | 13.96  | 25.64 | 12.72  | 14.58   |

AFB1: aflatoxin B1. A+S: AFB1+STER. M1-5: male rats from 1 to 5. NC: negative control. LOQ: limit of quantification (3.68 ng/g). STER: sterigmatocystin.

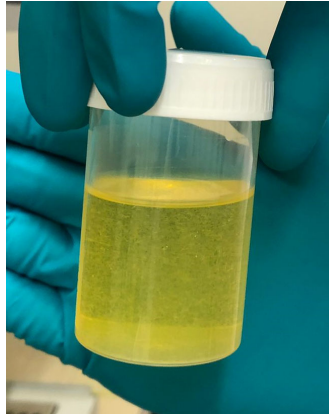

**Figure S1.** Suspension with turbidity of STER at 2 mg/mL (20 mg/kg b.w.) in corn oil.

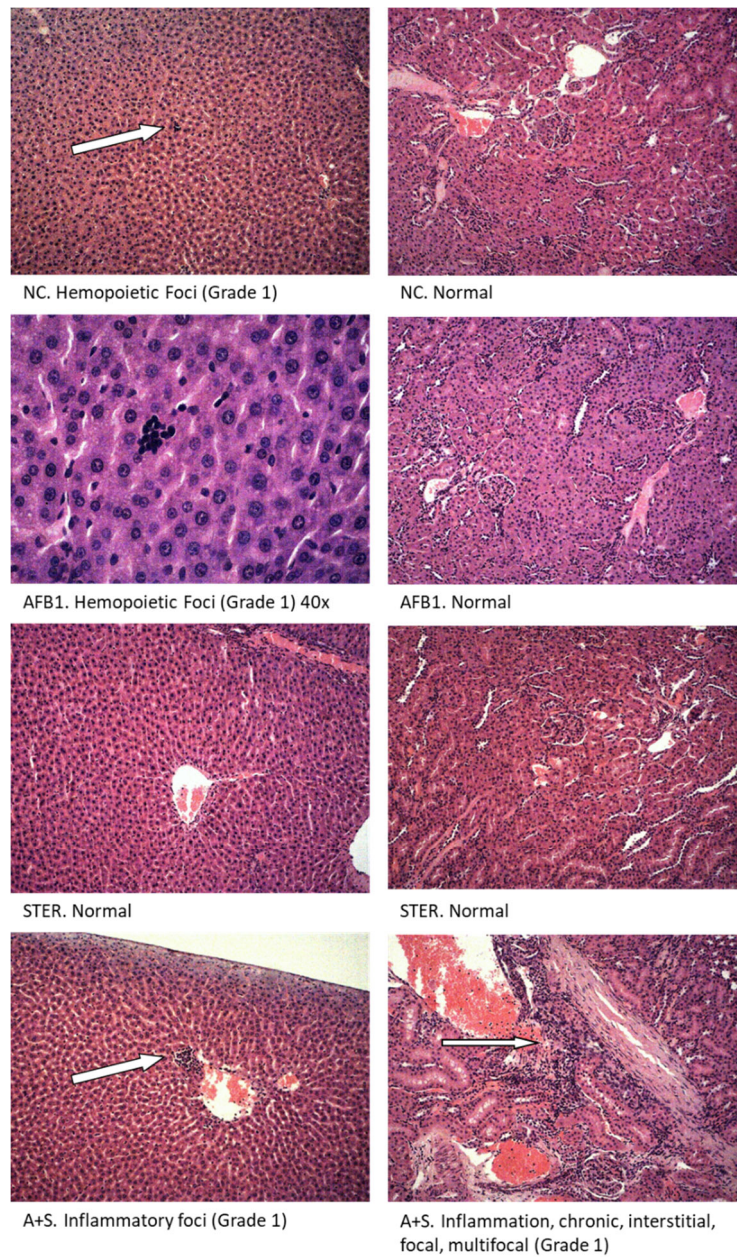

**Figure S2.** Microphotographs of the livers (left) and kidneys (right) from the rats treated 3h. All images were taken at 10x except for the AFB1 liver (40x). In the bottom of the image there are observations of the status of the organs. NC: negative control. AFB1: aflatoxin B1. STER: sterigmatocystin. A+S: AFB1+STER.



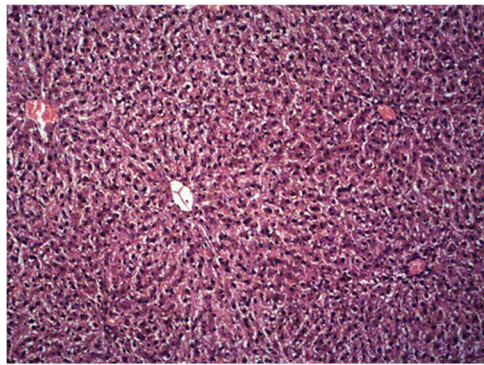

NC. Normal

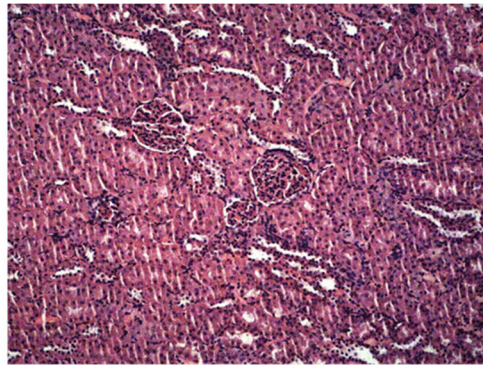

NC. Normal

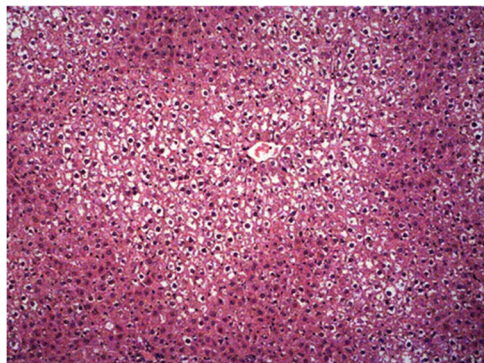

AFB1. Glcogen deposition (Grade 2)

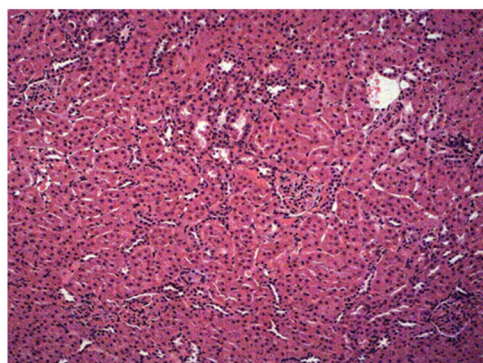

AFB1. Normal

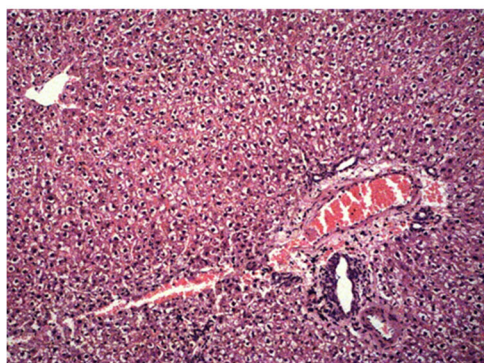

STER. Glcogen deposition (Grade 1)

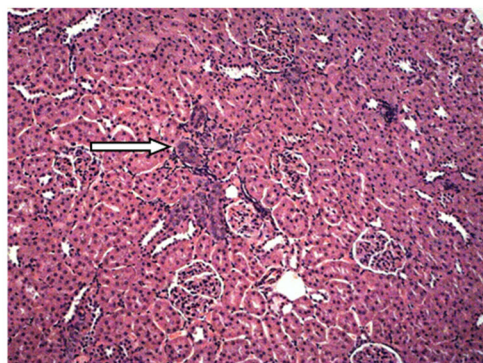

STER. Tubular basophilia, focal/ multifocal (Grade 1)

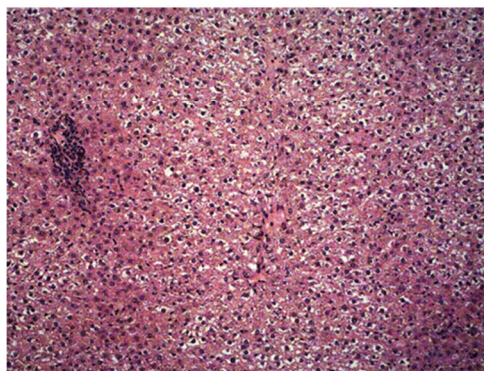

A+S. Glcogen deposition (Grade 1)

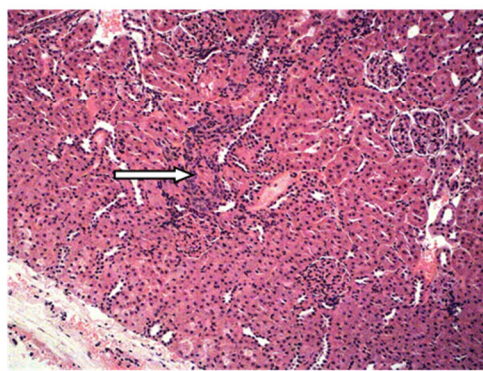

A+S. Tubular basophilia, focal/multifocal (Grade 1)

**Figure S3.** Microphotographs of the livers (left) and kidneys (right) from the rats treated 24h. All images were taken at 10x. In the bottom of the image there are observations of the status of the organs. NC: negative control. AFB1: aflatoxin B1. STER: sterigmatocystin. A+S: AFB1+STER. Glcogen: glucogen.
